1 **SARS-CoV-2-specific T Cell Memory is Sustained in COVID-19 Convalescents for 8 Months**  
2 **with Successful Development of Stem Cell-like Memory T Cells**

3

4 Jae Hyung Jung<sup>1†</sup>, Min-Seok Rha<sup>1†</sup>, Moa Sa<sup>1,2</sup>, Hee Kyoung Choi<sup>3</sup>, Ji Hoon Jeon<sup>3</sup>, Hyeri Seok<sup>3</sup>,  
5 Dae Won Park<sup>3</sup>, Su-Hyung Park<sup>1,2</sup>, Hye Won Jeong<sup>4\*</sup>, Won Suk Choi<sup>3\*</sup>, Eui-Cheol Shin<sup>1,2\*</sup>

6

7 <sup>1</sup>Graduate School of Medical Science and Engineering, Korea Advanced Institute of Science  
8 and Technology (KAIST), Daejeon 34141, Republic of Korea

9 <sup>2</sup>The Center for Epidemic Preparedness, KAIST Institute, Daejeon 34141, Republic of Korea

10 <sup>3</sup>Division of Infectious Diseases, Department of Internal Medicine, Korea University College  
11 of Medicine, Ansan Hospital, Ansan 15355, Republic of Korea

12 <sup>4</sup>Department of Internal Medicine, Chungbuk National University College of Medicine,  
13 Cheongju 28644, Republic of Korea

14

15 <sup>†</sup>These authors contributed equally.

16

17 <sup>\*</sup>Corresponding authors

18 Eui-Cheol Shin, M.D., Ph.D., e-mail: [ecshin@kaist.ac.kr](mailto:ecshin@kaist.ac.kr)

19 Won Suk Choi, M.D., Ph.D., e-mail: [cmcws@korea.ac.kr](mailto:cmcws@korea.ac.kr)

20 Hye Won Jeong, M.D., Ph.D., e-mail: [hwjeong@chungbuk.ac.kr](mailto:hwjeong@chungbuk.ac.kr)

21 **Abstract**

22 Memory T cells contribute to rapid viral clearance during re-infection, but the longevity and  
23 differentiation of SARS-CoV-2-specific memory T cells remain unclear. We conducted direct  
24 *ex vivo* assays to evaluate SARS-CoV-2-specific CD4<sup>+</sup> and CD8<sup>+</sup> T cell responses in COVID-19  
25 convalescents up to 254 days post-symptom onset (DPSO). Here, we report that memory T  
26 cell responses were maintained during the study period. In particular, we observed  
27 sustained polyfunctionality and proliferation capacity of SARS-CoV-2-specific T cells. Among  
28 SARS-CoV-2-specific CD4<sup>+</sup> and CD8<sup>+</sup> T cells detected by activation-induced markers, the  
29 proportion of stem cell-like memory T (T<sub>SCM</sub>) cells increased, peaking at approximately 120  
30 DPSO. Development of T<sub>SCM</sub> cells was confirmed by SARS-CoV-2-specific MHC-I multimer  
31 staining. Considering the self-renewal capacity and multipotency of T<sub>SCM</sub> cells, our data  
32 suggest that SARS-CoV-2-specific T cells are long-lasting after recovery from COVID-19. The  
33 current study provides insight for establishing an effective vaccination program and  
34 epidemiological measurement.

## 35 Introduction

36 Severe acute respiratory syndrome coronavirus 2 (SARS-CoV-2) infection causes  
37 coronavirus disease 2019 (COVID-19), an ongoing pandemic disease that threatens public  
38 health<sup>1</sup>. As of January 17, 2021, more than 93.2 million confirmed cases had been reported,  
39 and over 2 million deaths worldwide<sup>2</sup>. After SARS-CoV-2 infection, some patients,  
40 particularly elderly patients, develop severe COVID-19 that is associated with hyper-  
41 inflammatory responses<sup>3,4</sup>. Global efforts are underway to prevent the transmission of SARS-  
42 CoV-2 and to develop novel vaccines and therapeutic strategies. A thorough understanding  
43 of the immune responses against SARS-CoV-2 is urgently needed to control the COVID-19  
44 pandemic.

45 Increasing evidence has demonstrated that SARS-CoV-2-specific memory T cell  
46 responses are elicited after recovery from COVID-19. A number of studies have reported  
47 SARS-CoV-2-specific memory T cell responses in the early convalescent phase of COVID-19<sup>5-9</sup>.  
48 SARS-CoV-2-specific CD4<sup>+</sup> and CD8<sup>+</sup> T cells have been detected in 100% and ~70% of  
49 convalescent individuals a short time after resolution<sup>5</sup>. Recently, memory T cells were shown  
50 to contribute to protection against SARS-CoV-2 re-challenge in a rhesus macaque model<sup>10</sup>.  
51 Considering that T cell responses to SARS-CoV-1 and Middle East respiratory syndrome  
52 coronavirus (MERS-CoV) are long-lasting, up to >17 years<sup>6,11-13</sup>, SARS-CoV-2-specific memory  
53 T cells are expected to be maintained long-term and to contribute to rapid viral clearance  
54 during re-infection. A very recent study has examined SARS-CoV-2-specific T cell responses  
55 up to 8 months after infection using activation-induced marker (AIM) assays<sup>14</sup>.

56 Following natural infection or vaccination, the generation of effective and persistent  
57 T cell memory is essential for long-term protective immunity to the virus. Among diverse  
58 memory T cell subsets, stem cell-like memory T (T<sub>SCM</sub>) cells were recently reported to have  
59 the capacity for self-renewal and multipotency to repopulate the broad spectrum of  
60 memory and effector T cell subsets<sup>15,16</sup>. Thus, the successful generation of T<sub>SCM</sub> cells is  
61 required for long-term protective T cell immunity<sup>16</sup>. For example, long-lived memory T cells  
62 following vaccination with live-attenuated yellow fever virus (YFV) exhibit stem cell-like  
63 properties and mediate lifelong protection<sup>17,18</sup>. However, limited knowledge is available on  
64 the differentiation of SARS-CoV-2-specific memory T cells following recovery from COVID-19,  
65 particularly the generation of T<sub>SCM</sub> cells.

66           In the present study, we performed a comprehensive analysis of SARS-CoV-2-specific  
67 CD4<sup>+</sup> and CD8<sup>+</sup> T cell responses in peripheral blood mononuclear cells (PBMCs) from  
68 individuals with SARS-CoV-2 infection over 8 months post-infection. Using diverse T cell  
69 assays, we found that SARS-CoV-2-specific memory T cell responses were maintained 8  
70 months after the infection. In addition, we analyzed the differentiation of SARS-CoV-2-  
71 specific memory T cells during the study period and revealed the successful generation of  
72 T<sub>SCM</sub> cells. We also assessed the effector functions and proliferation capacity of long-term  
73 memory CD4<sup>+</sup> and CD8<sup>+</sup> T cells.

## 74 **Results**

### 75 ***Study cohort***

76 We recruited 94 individuals with SARS-CoV-2 infection. The peak disease severity  
77 was evaluated according to the NIH severity of illness categories<sup>19</sup>: asymptomatic (n=6), mild  
78 (n=44), moderate (n=23), severe (n=13), and critical (n=8). Whole blood samples were  
79 obtained longitudinally (2-4 time points) from 38 patients or at a single time point from 56  
80 patients. Whole blood was collected 1 to 254 days post-symptom onset (DPSO). Finally, a  
81 total of 160 PBMC samples were analyzed. Among 160 PBMC samples, 33 samples were  
82 obtained in the acute phase when viral RNA was still detected (1 - 33 DPSO), and 127  
83 samples were obtained in the convalescent phase after the negative conversion of viral RNA  
84 (31 - 254 DPSO). In the current study, we defined the acute phase as 1 - 30 DPSO, and the  
85 convalescent phase as 31 - 254 DPSO. The demographic and clinical characteristics of  
86 enrolled patients are presented in Supplementary Table 1.

87

### 88 ***SARS-CoV-2-specific T cell responses are sustained 8 months after the infection***

89 First, we performed direct *ex vivo* interferon- $\gamma$  (IFN- $\gamma$ ) enzyme-linked immunospot  
90 (ELISpot) assays following stimulation of PBMCs with overlapping peptide (OLP) pools  
91 spanning the spike (S), membrane (M), and nucleocapsid (N) proteins of SARS-CoV-2. S-, M-,  
92 and N-specific IFN- $\gamma$  spot numbers increased during the acute phase. Subsequently, there  
93 was a decreasing tendency until 60 - 120 DPSO, and the IFN- $\gamma$  responses were maintained  
94 over 8 months (Fig. 1a). These kinetics were also observed when S-, M-, and N-specific IFN- $\gamma$   
95 spot numbers were summed (Fig. 1a). In each PBMC sample, all three OLP pools evenly  
96 contributed to the IFN- $\gamma$  responses without antigen dominance (Fig. 1b). We divided  
97 convalescent samples into three groups based on the DPSO at sample collection: T1 (31 - 99  
98 DPSO), T2 (100 - 199 DPSO), and T3 (200 - 254 DPSO). We found no significant difference in  
99 IFN- $\gamma$  spot numbers among groups (Fig. 1c), and an even contribution of antigens for the IFN-  
100  $\gamma$  response was maintained among groups (Extended Data Fig. 1). Next, we focused on  
101 longitudinally tracked samples from 30 individuals in the convalescent phase. S-, M-, and N-  
102 specific and summed IFN- $\gamma$  spot numbers were stable during the convalescent phase (Fig.  
103 1d). When we compared paired samples from the same patient at two time points (t1, 31 -  
104 100 DPSO; t2, 200 - 254 DPSO), we found no significant difference in IFN- $\gamma$  spot numbers

105 (Fig. 1e).

106 We also evaluated SARS-CoV-2-specific T cell responses by AIM assays<sup>5,20,21</sup> following  
107 stimulation of PBMCs with OLP pools of S, M, and N. CD137<sup>+</sup>OX40<sup>+</sup> cells were considered  
108 SARS-CoV-2-specific cells among CD4<sup>+</sup> T cells, and CD137<sup>+</sup>CD69<sup>+</sup> cells were considered SARS-  
109 CoV-2-specific cells among CD8<sup>+</sup> T cells<sup>5</sup> (Fig. 2a, b). We confirmed a strong positive  
110 correlation between the frequency of CD137<sup>+</sup>OX40<sup>+</sup> cells and the frequencies of alternative  
111 AIM<sup>+</sup> cells (OX40<sup>+</sup>CD154<sup>+</sup> or CD137<sup>+</sup>CD154<sup>+</sup> cells) among CD4<sup>+</sup> T cells (Extended Data Fig. 2).  
112 The frequency of S-, M-, and N-specific CD137<sup>+</sup>OX40<sup>+</sup> cells among CD4<sup>+</sup> T cells increased  
113 during the acute phase, decreased until 60 DPO, and then was maintained over 8 months  
114 (Fig. 2c). When the frequency of S-, M-, and N-specific CD137<sup>+</sup>OX40<sup>+</sup> cells was summed,  
115 similar kinetics were observed (Fig. 2c). The frequency of CD137<sup>+</sup>CD69<sup>+</sup> cells among CD8<sup>+</sup> T  
116 cells was relatively low compared to the frequency of CD137<sup>+</sup>OX40<sup>+</sup> cells among CD4<sup>+</sup> T cells,  
117 but exhibited similar kinetics (Fig. 2c). We also observed a positive correlation between the  
118 frequency of CD137<sup>+</sup>OX40<sup>+</sup> cells among CD4<sup>+</sup> T cells and the frequency of CD137<sup>+</sup>CD69<sup>+</sup> cells  
119 among CD8<sup>+</sup> T cells (Extended Data Fig. 3).

120 Collectively, these results indicate that SARS-CoV-2-specific T cell responses are long-  
121 lasting over 8 months in COVID-19 convalescents.

122

### 123 ***SARS-CoV-2-specific T<sub>SCM</sub> cells develop after the infection***

124 Next, we examined the differentiation status of SARS-CoV-2-specific AIM<sup>+</sup> T cells  
125 based on CCR7 and CD45RA expression in CD4<sup>+</sup> (Fig. 3a) and CD8<sup>+</sup> (Fig. 3b) T cell populations.  
126 Among SARS-CoV-2-specific AIM<sup>+</sup>CD4<sup>+</sup> T cells, the proportion of CCR7<sup>+</sup>CD45RA<sup>-</sup> (T<sub>CM</sub>) cells  
127 was maintained at approximately 50% on average during the study period, and the  
128 proportion of CCR7<sup>-</sup>CD45RA<sup>-</sup> (T<sub>EM</sub>) cells increased up to approximately 35% on average until  
129 60 DPO and then maintained thereafter (Fig. 3c). CCR7<sup>-</sup>CD45RA<sup>+</sup> (T<sub>EMRA</sub>) cells were a minor  
130 population (< 5%; Fig. 3c). Notably, the proportion of CCR7<sup>+</sup>CD45RA<sup>+</sup> cells, which include  
131 both naïve and T<sub>SCM</sub> cells, was approximately 30% on average in the acute phase, decreasing  
132 to approximately 10% on average by 60 DPO and then maintained thereafter (Fig. 3c).

133 Among SARS-CoV-2-specific AIM<sup>+</sup>CD8<sup>+</sup> T cells, the proportion of CCR7<sup>+</sup>CD45RA<sup>-</sup> (T<sub>CM</sub>)  
134 cells was approximately 20% on average in the acute phase and gradually decreased during  
135 the study period (Fig. 3d). The proportion of CCR7<sup>-</sup>CD45RA<sup>-</sup> (T<sub>EM</sub>) cells increased up to 50%

136 on average until 60 DPSO and was maintained thereafter (Fig. 3d). The proportion of CCR7<sup>-</sup>  
137 CD45RA<sup>+</sup> (T<sub>EMRA</sub>) cells and CCR7<sup>+</sup>CD45RA<sup>+</sup> cells was maintained (~25% and 25-35% on  
138 average, respectively) during the study period (Fig. 3d).

139 We further investigated whether CCR7<sup>+</sup>CD45RA<sup>+</sup> cells include T<sub>SCM</sub> cells, which have  
140 a self-renewal capacity and multipotency for differentiation into diverse T cell subsets, by  
141 examining CD95, a marker of T<sub>SCM</sub> cells<sup>15,16</sup>. In both AIM<sup>+</sup>CD4<sup>+</sup> and AIM<sup>+</sup>CD8<sup>+</sup> T cells, CD95<sup>+</sup>  
142 cells were a dominant population among CCR7<sup>+</sup>CD45RA<sup>+</sup> cells (Fig. 3e), indicating that the  
143 CCR7<sup>+</sup>CD45RA<sup>+</sup> cells among AIM<sup>+</sup>CD4<sup>+</sup> or AIM<sup>+</sup>CD8<sup>+</sup> T cells are mainly T<sub>SCM</sub> cells. The  
144 frequency of T<sub>SCM</sub> cells among both AIM<sup>+</sup>CD4<sup>+</sup> and AIM<sup>+</sup>CD8<sup>+</sup> T cells gradually increased until  
145 120 DPSO, when it reached a stable plateau (Fig. 3e). We found no significant difference in  
146 the frequency of T<sub>SCM</sub> cells among AIM<sup>+</sup>CD4<sup>+</sup> and AIM<sup>+</sup>CD8<sup>+</sup> T cells between T1 (31 - 99  
147 DPSO), T2 (100 - 199 DPSO), and T3 (200 - 254 DPSO; Extended Data Fig. 4a, b).

148

149 ***Successful development of SARS-CoV-2-specific T<sub>SCM</sub> cells is confirmed by direct ex vivo***  
150 ***MHC-I multimer staining***

151 To validate the results from *in vitro* stimulation-based AIM assays, we detected  
152 SARS-CoV-2-specific CD8<sup>+</sup> T cells by performing direct *ex vivo* MHC-I multimer staining and  
153 examined the differentiation status of MHC-I multimer<sup>+</sup> cells. We used an HLA-A\*02  
154 multimer loaded with SARS-CoV-2 S<sub>269</sub> (YLQPRTFLL) peptide that has a low degree of  
155 homology to the human common cold coronaviruses (ccCoVs)<sup>22,23</sup>. MHC-I multimer<sup>+</sup> cells  
156 were detected during the study period until 234 DPSO (Fig. 4a, b), and we determined the  
157 proportions of T<sub>CM</sub> (CCR7<sup>+</sup>CD45RA<sup>-</sup>), T<sub>EM</sub> (CCR7<sup>-</sup>CD45RA<sup>-</sup>), T<sub>EMRA</sub> (CCR7<sup>-</sup>CD45RA<sup>+</sup>), and T<sub>SCM</sub>  
158 (CCR7<sup>+</sup>CD45RA<sup>+</sup>CD95<sup>+</sup>) cells among MHC-I multimer<sup>+</sup> cells (Fig. 4c). Influenza A virus (IAV)-  
159 and cytomegalovirus (CMV)-specific MHC-I multimers were also used to stain PBMCs from  
160 healthy donors. Similar to the data from AIM<sup>+</sup>CD8<sup>+</sup> T cells, T<sub>EM</sub> and T<sub>EMRA</sub> cells were the  
161 dominant populations among SARS-CoV-2-specific MHC-I multimer<sup>+</sup> cells, whereas T<sub>CM</sub> cells  
162 were a minor population during the study period (Fig. 4d). Among IAV- and CMV-specific  
163 MHC-I multimer<sup>+</sup> cells from healthy donors, T<sub>EM</sub> and T<sub>EMRA</sub> cells were dominantly present,  
164 whereas T<sub>CM</sub> cells were scarcely detected. T<sub>SCM</sub> cells were also detected among SARS-CoV-2-  
165 specific MHC-I multimer<sup>+</sup> cells during the study period, but not among IAV- and CMV-specific  
166 cells (Fig. 4d). In particular, the frequency of T<sub>SCM</sub> cells among SARS-CoV-2-specific MHC-I

167 multimer<sup>+</sup> cells was high 60 – 125 DPSO.

168 A recent study has revealed two distinct subsets of CCR7<sup>+</sup> stem cell-like progenitors:  
169 CCR7<sup>+</sup>PD-1<sup>-</sup>TIGIT<sup>-</sup> cells with stem cell-like features and CCR7<sup>+</sup>PD-1<sup>+</sup>TIGIT<sup>+</sup> cells with exhausted  
170 traits<sup>24</sup>. Therefore, we examined the expression of PD-1 and TIGIT in SARS-CoV-2-specific  
171 MHC-I multimer<sup>+</sup> T<sub>SCM</sub> cells. The frequency of PD-1<sup>+</sup>TIGIT<sup>+</sup> cells was significantly lower among  
172 SARS-CoV-2-specific T<sub>SCM</sub> cells than among total CD8<sup>+</sup> T cells (Fig. 4e), confirming that SARS-  
173 CoV-2-specific T<sub>SCM</sub> cells are *bona fide* stem-like memory cells.

174

175 ***Polyfunctionality and proliferation capacity are preserved in long-term SARS-CoV-2-***  
176 ***specific T cells***

177 As we observed the generation of SARS-CoV-2-specific T<sub>SCM</sub> cells with self-renewal  
178 capacity and multipotency, we aimed to examine the kinetics of the polyfunctionality of  
179 SARS-CoV-2-specific T cells during the study period. To this end, we performed intracellular  
180 cytokine staining of IFN- $\gamma$ , IL-2, TNF, and CD107a following stimulation with OLP pools of S,  
181 M, and N and analyzed the polyfunctionality of CD4<sup>+</sup> and CD8<sup>+</sup> T cells (Fig. 5a). We defined  
182 polyfunctional cells as cells exhibiting positivity for  $\geq 2$  effector functions. Among SARS-CoV-  
183 2-specific CD4<sup>+</sup> and CD8<sup>+</sup> T cells, the average proportion of polyfunctional cells was 25 - 40%  
184 and 30 - 50%, respectively, 60 DPSO, and was maintained until 254 DPSO (Fig. 5b). We found  
185 no significant difference in the frequency of polyfunctional cells among SARS-CoV-2-specific  
186 CD4<sup>+</sup> and CD8<sup>+</sup> T cells between T1 (31 - 99 DPSO), T2 (100 - 199 DPSO), and T3 (200 - 254  
187 DPSO; Fig. 5c). Preserved polyfunctionality among SARS-CoV-2-specific CD4<sup>+</sup> and CD8<sup>+</sup> T cells  
188 was also observed when polyfunctionality was evaluated according to the number of  
189 positive effector functions (Fig. 5d).

190 Finally, we examined the antigen-induced proliferation capacity of long-term SARS-  
191 CoV-2-specific memory T cells. We performed CellTrace Violet (CTV) dilution assays and Ki-  
192 67 staining using PBMCs obtained after 200 DPSO. CD4<sup>+</sup> T cells exhibited a robust  
193 proliferative response following *in vitro* stimulation with the S OLP pool (Fig. 5e), indicating  
194 that SARS-CoV-2-specific memory T cells elicit rapid recall responses upon viral re-exposure.

195 Considering preserved polyfunctionality and proliferation capacity of SARS-CoV-2-  
196 specific memory T cells, the current data indicate that memory T cells contribute to  
197 protective immunity against re-infection even 8 months after the primary infection.



198 **Discussion**

199 Memory T cells play a crucial role in viral clearance during re-infection, but the  
200 longevity and differentiation status of SARS-CoV-2-specific memory T cells among COVID-19  
201 convalescents remain unclear. In the present study, we demonstrated that SARS-CoV-2-  
202 specific memory T cell responses were maintained in COVID-19 convalescents 8 months  
203 post-infection. Notably, we found that SARS-CoV-2-specific T<sub>SCM</sub> cells were successfully  
204 developed, indicating that SARS-CoV-2-specific T cell memory may be long-lasting in COVID-  
205 19 convalescents. These findings were supported by the SARS-CoV-2-specific T cells from  
206 PBMCs obtained after 200 DPO exhibiting sustained polyfunctionality and proliferation  
207 capacity. Our results may fill a gap in understanding T cell memory responses after recovery  
208 from SARS-CoV-2 infection.

209 Recent studies suggest critical roles of T cells in the clearance of SARS-CoV-2 and  
210 protection from developing severe COVID-19. In particular, it has been shown that  
211 coordination of adaptive immune responses, including CD4<sup>+</sup> T cell, CD8<sup>+</sup> T cell, and antibody  
212 responses, is essential for controlling COVID-19<sup>20</sup>. Notably, peak disease severity has been  
213 shown to inversely correlate with the frequency of SARS-CoV-2-specific CD4<sup>+</sup> and CD8<sup>+</sup> T cells  
214 instead of SARS-CoV-2 antibody titers<sup>20</sup>. In another study, T cell responses were detected  
215 among COVID-19 convalescents without detectable SARS-CoV-2 IgG<sup>25</sup>. In a rhesus macaque  
216 model, CD8-depleted convalescent animals exhibited limited viral clearance in the  
217 respiratory tract upon SARS-CoV-2 re-challenge, suggesting that CD8<sup>+</sup> T cells contribute to  
218 viral clearance during SARS-CoV-2 re-infection<sup>10</sup>. Collectively, these studies strongly  
219 demonstrate a protective role of T cells in COVID-19.

220 Currently, we do not have exact information on how long adaptive immune memory  
221 lasts in COVID-19 convalescents. Whether antibody responses to SARS-CoV-2 wane over  
222 time in patients who have recovered from COVID-19 remains controversial<sup>26-28</sup>. Previous  
223 studies on SARS-CoV-1 and MERS-CoV infection have shown that T cell responses were more  
224 enduring compared to antibody responses<sup>12,13</sup>. A recent study detected SARS-CoV-1-specific  
225 T cell responses 17 years after infection<sup>6</sup>. Similarly, slow decay of SARS-CoV-2-specific  
226 memory T cells is expected. In the present study, we demonstrated the maintenance of  
227 SARS-CoV-2-specific memory T cell responses in COVID-19 convalescents over 8 months  
228 post-infection using a battery of T cell assays. Given that vaccination programs for

229 prophylaxis of SARS-CoV-2 infection are being launched worldwide, another question is how  
230 long memory T cells elicited by vaccination will last. Vaccine-induced memory T cells may  
231 differ in phenotype and durability from infection-induced memory T cells, which should be  
232 addressed in future studies.

233 A series of studies have reported the existence of SARS-CoV-2-reactive T cell  
234 responses among unexposed individuals, suggesting that memory T cells induced by  
235 previous ccCoV infection are cross-reactive to SARS-CoV-2 proteins<sup>5,29-32</sup>. Therefore, in the  
236 present study, we could not distinguish *de novo* primed T cells by SARS-CoV-2 infection from  
237 pre-existing, cross-reactive ccCoV-specific T cells. However, we could selectively examine *de*  
238 *novo* primed SARS-CoV-2-specific T cells by staining with an HLA-A\*02 multimer loaded with  
239 SARS-CoV-2 S<sub>269</sub> (YLQPRTFLL) peptide. This epitope peptide has a low degree of homology  
240 with ccCoVs, including OC43, HKU1, 229E, and NL63<sup>22,23</sup>. In future studies of SARS-CoV-2-  
241 specific T cell responses, cross-reactive epitope peptides and SARS-CoV-2-specific epitope  
242 peptides will need to be used separately<sup>30</sup>.

243 Among distinct subsets of memory T cells, T<sub>SCM</sub> cells possess a superior ability for  
244 self-renewal, memory recall responses, and multipotency to reconstitute diverse memory  
245 subsets<sup>15</sup>. Therefore, long-term T cell memory relies on the successful generation of T<sub>SCM</sub>  
246 cells<sup>16</sup>. Previous studies showed that long-lasting YFV-specific CD8<sup>+</sup> T cells resemble T<sub>SCM</sub>  
247 cells<sup>17,18</sup>. We and others have also suggested the generation of SARS-CoV-2-specific T<sub>SCM</sub> cells  
248 in the convalescent phase of COVID-19 on the basis of the expression of CCR7 and  
249 CD45RA<sup>8,23</sup>. However, these studies on COVID-19 patients did not examine the definitive  
250 marker of T<sub>SCM</sub> cells, CD95. In the present study, we delineated the kinetics of T<sub>SCM</sub> cells using  
251 both AIM assays and MHC-I multimer staining, and observed the successful generation of  
252 T<sub>SCM</sub> cells in COVID-19 convalescents. In line with these findings, we also found sustained  
253 polyfunctionality and proliferation capacity, suggesting efficient memory recall responses. A  
254 recent study has proposed that CCR7<sup>+</sup> stem-like progenitor cells are composed of two  
255 separate populations, which are distinguished by PD-1 and TIGIT expression<sup>24</sup>. We  
256 demonstrated that PD-1 and TIGIT are rarely expressed in SARS-CoV-2-specific T<sub>SCM</sub> cells,  
257 indicating that SARS-CoV-2-specific T<sub>SCM</sub> cells are not exhausted-like progenitors, but *bona*  
258 *fide* stem-like memory cells.

259 Polyfunctional T cells, which exert multiple effector functions simultaneously, play a

260 critical role in host protection against viral infection<sup>33-35</sup>. For example, polyfunctional CD8<sup>+</sup> T  
261 cells are preserved in human immunodeficiency virus-infected long-term non-progressors<sup>34</sup>.  
262 In addition, polyfunctional T cell responses are associated with effective control of hepatitis  
263 C virus (HCV)<sup>35</sup>. It has also been reported that virus-specific polyfunctional T cells can be  
264 successfully developed by immunization with vaccinia virus<sup>36</sup> and an HCV vaccine<sup>37</sup>.  
265 Collectively, polyfunctional memory T cells control viral infection more efficiently than  
266 monofunctional T cells. Therefore, generation of polyfunctional memory T cells following  
267 natural infection or vaccination is expected to confer protective immunity. In this regard, the  
268 sustained polyfunctionality of long-term SARS-CoV-2-specific T cells observed in our study is  
269 highly suggestive of long-lasting protective immunity in COVID-19 convalescents.

270 In summary, we conducted a comprehensive analysis of SARS-CoV-2-specific  
271 memory T cell responses over 8 months post-infection. Our current analysis provides  
272 valuable information regarding the longevity and differentiation of SARS-CoV-2-specific  
273 memory T cells elicited by natural infection. These data add to our basic understanding of  
274 memory T cell responses in COVID-19, which aids in establishing an effective vaccination  
275 program and epidemiological measurement.

## 276 **Methods**

### 277 ***Patients and specimens***

278 In this study, 94 patients with PCR-confirmed SARS-CoV-2 infection were enrolled  
279 from Ansan Hospital and Chungbuk National University Hospital, Republic of Korea.  
280 Peripheral blood was obtained from all patients with SARS-CoV-2 infection. We also obtained  
281 peripheral blood from seven healthy donors. In six asymptomatic patients, the date of the  
282 first admission was regarded as 7 DPSO because the date of the first admission among  
283 symptomatic patients was an average 7 DPSO. This study was reviewed and approved by the  
284 institutional review board of all participating institutions and conducted according to the  
285 principles of the Declaration of Helsinki. Informed consent was obtained from all donors and  
286 patients.

287 PBMCs were isolated by density gradient centrifugation using Lymphocyte  
288 Separation Medium (Corning). After isolation, the cells were cryopreserved in fetal bovine  
289 serum (FBS; Corning) with 10% dimethyl sulfoxide (DMSO; Sigma-Aldrich) until use.

290

### 291 ***Ex vivo IFN- $\gamma$ enzyme-linked immunospot assay***

292 Plates with hydrophobic polyvinylidene difluoride membrane (Millipore, Billerica,  
293 MA) were coated with 2  $\mu\text{g}/\text{mL}$  anti-human monoclonal IFN- $\gamma$  coating antibody (clone 1-D1K,  
294 Mabtech) overnight at 4°C. The plates were washed with sterile phosphate-buffered saline  
295 (PBS) and blocked with 1% bovine serum albumin (Bovogen) for 1 hour at room temperature  
296 (RT). 700,000 PBMCs were seeded per well and stimulated with 1  $\mu\text{g}/\text{mL}$  OLP pools spanning  
297 SARS-CoV-2 spike, membrane, and nucleocapsid proteins (Miltenyi Biotec) for 24 hours at  
298 37°C. We used 10  $\mu\text{g}/\text{mL}$  phytohemagglutinin as a positive control and an equimolar amount  
299 of DMSO as a negative control. Plates were washed with 0.05% Tween-PBS (Junsei Chemical)  
300 and incubated with 0.25  $\mu\text{g}/\text{mL}$  biotinylated anti-human monoclonal IFN- $\gamma$  antibody (clone  
301 7-B6-1, Mabtech) for 2 hours at RT. After washing, streptavidin-alkaline phosphatase  
302 (Invitrogen) was added sequentially. Precipitates were detected with AP color reagent (Bio-  
303 Rad) and the reaction stopped by rinsing with distilled water. Spot-forming units were  
304 quantified using an automated ELISpot reader (AID). To quantify SARS-CoV-2-specific  
305 responses, spots in the negative control wells were subtracted from the OLP-stimulated  
306 wells.

307

### 308 ***Multi-color flow cytometry***

309 Cells were stained with fluorochrome-conjugated antibodies for specific surface  
310 markers for 10 minutes at RT. Dead cells were excluded using LIVE/DEAD red fluorescent  
311 reactive dye (Invitrogen). In intracellular staining experiments, cells were fixed and  
312 permeabilized using the FoxP3 staining buffer kit (Invitrogen), and then stained for  
313 intracellular markers for 30 minutes at 4°C. Multi-color flow cytometry was performed using  
314 an LSR II instrument (BD Biosciences) and the data analyzed in FlowJo software (FlowJo LLC).  
315 The fluorochrome-conjugated MHC-I multimers and monoclonal antibodies used in this  
316 study are listed in Supplementary Table 2.

317

### 318 ***Activation-induced marker assay***

319 PBMCs were blocked with 0.5 µg/mL anti-human CD40 mAb (clone HB14, Miltenyi  
320 Biotec) in RPMI 1640 supplemented with 10% FBS and 1% penicillin and streptomycin for 15  
321 minutes at 37°C. The cells were then cultured in the presence of 1 µg/mL SARS-CoV-2 OLP  
322 pools and 1 µg/mL anti-human CD28 and CD49d mAbs (clone L293 and L25, respectively, BD  
323 Biosciences) for 24 hours. Stimulation with an equal concentration of DMSO in PBS was  
324 performed as a negative control.

325

### 326 ***MHC-I multimer staining***

327 PBMCs were stained with APC-conjugated MHC-I SARS-CoV-2 S<sub>269</sub> pentamer  
328 (Proimmune), IAV MP<sub>58</sub> dextramer (Immudex), or CMV pp65<sub>495</sub> dextramer (Immudex) for 15  
329 minutes at RT and washed twice. Additional surface markers were stained using the  
330 protocols described above.

331

### 332 ***Stimulation for intracellular cytokine staining***

333 PBMCs were cultured in the presence of SARS-CoV-2 OLP pools and 1 µg/mL anti-  
334 human CD28 and CD49d mAbs for 6 hours at 37°C. Brefeldin A (GolgiPlug, BD Biosciences)  
335 and monensin (GolgiStop, BD Biosciences) were added 1 hour after the initial stimulation.

336

### 337 ***Proliferation assays***

338 PBMCs were labeled using the CellTrace™ Violet Cell Proliferation Kit (Invitrogen) at  
339 a concentration of  $1.0 \times 10^6$  cells/mL for 20 minutes at 37°C. We then added 1% FBS-PBS to  
340 the cells for 5 minutes at RT to quench unbound dyes. Cells were washed and cultured in  
341 RPMI 1640 (Corning) containing 10% FBS (Corning) and 1% penicillin-streptomycin  
342 (Welgene) at a concentration of 500,000 cells per well in the presence of 1 µg/mL SARS-CoV-  
343 2 spike peptide pools and 1 µg/mL anti-human CD28 and CD49d mAbs (clone L293 and L25  
344 respectively, BD Biosciences) for 120 hours. Stimulation with an equal concentration of  
345 DMSO in PBS was performed as a negative control. After incubation, cells were harvested  
346 and stained with antibodies for analysis by flow cytometry.

347

#### 348 ***Data quantification and statistical analysis***

349 Data were calculated as background-subtracted data. Background-subtracted data  
350 were derived by subtracting the value after DMSO stimulation. When three stimuli were  
351 combined, the value after each stimulation was combined and we subtracted triple the  
352 value derived from DMSO stimulation.

353 Statistical analyses were performed using GraphPad Prism version 9 for Windows  
354 (GraphPad Software). Significance was set at  $p < 0.05$ . The Wilcoxon signed-rank test was  
355 used to compare data between two paired groups. In addition, the Kruskal-Wallis test with  
356 Dunns' multiple comparisons test was used to compare non-parametric data between  
357 multiple unpaired groups. To assess the significance of correlation, the Spearman correlation  
358 test was used. In cross-sectional analyses, a non-parametric local regression (LOESS) function  
359 was employed with 95% confidence interval.

360 **Data availability**

361 Data relating to the findings of this study are available from the corresponding author upon  
362 reasonable request.

363

364 **Acknowledgments**

365 This work was supported by the Samsung Science and Technology Foundation under Project  
366 Number SSTF-BA1402-51, and the Mobile Clinic Module Project funded by KAIST.

367

368 **Author Contributions**

369 J.H.J., M.-S.R., H.W.J., W.S.C., and E.-C.S. designed the research. H.K.C., J.H.J., H.S., D.W.P.,  
370 H.W.J., and W.S.C. collected clinical specimens. J.H.J., M.-S.R., and M.S. performed  
371 experiments. J.H.J., M.-S.R., S.-H.P., and E.-C.S. analyzed the results. J.H.J., M.-S.R. and E.-  
372 C.S. wrote the manuscript.

373

374 **Competing Interests**

375 The authors have no competing interests.

376 **References**

- 377 1 Huang, C. *et al.* Clinical features of patients infected with 2019 novel coronavirus in Wuhan, China.  
378 *Lancet* **395**, 497-506 (2020).
- 379 2 World Health Organization. COVID-19 Weekly Epidemiological Update-19 January 2020  
380 <https://www.who.int/publications/m/item/weekly-epidemiological-update-19-january-2020> (2020).
- 381 3 Lee, J. S. *et al.* Immunophenotyping of COVID-19 and influenza highlights the role of type I interferons  
382 in development of severe COVID-19. *Sci. Immunol.* **5**, eabd1554 (2020).
- 383 4 Lee, J. S. & Shin, E. C. The type I interferon response in COVID-19: implications for treatment. *Nat. Rev.*  
384 *Immunol.* **20**, 585-586 (2020).
- 385 5 Grifoni, A. *et al.* Targets of T Cell Responses to SARS-CoV-2 Coronavirus in Humans with COVID-19  
386 Disease and Unexposed Individuals. *Cell* **181**, 1489-1501.e15 (2020).
- 387 6 Le Bert, N. *et al.* SARS-CoV-2-specific T cell immunity in cases of COVID-19 and SARS, and uninfected  
388 controls. *Nature* **584**, 457-462 (2020).
- 389 7 Peng, Y. *et al.* Broad and strong memory CD4(+) and CD8(+) T cells induced by SARS-CoV-2 in UK  
390 convalescent individuals following COVID-19. *Nat. Immunol.* **21**, 1336-1345 (2020).
- 391 8 Sekine, T. *et al.* Robust T Cell Immunity in Convalescent Individuals with Asymptomatic or Mild COVID-  
392 19. *Cell* **183**, 158-168.e14 (2020).
- 393 9 Rodda, L. B. *et al.* Functional SARS-CoV-2-Specific Immune Memory Persists after Mild COVID-19. *Cell*  
394 **184**, 169-183.e17 (2020).
- 395 10 McMahan, K. *et al.* Correlates of protection against SARS-CoV-2 in rhesus macaques. *Nature*,  
396 doi:10.1038/s41586-020-03041-6 (2020).
- 397 11 Ng, O. W. *et al.* Memory T cell responses targeting the SARS coronavirus persist up to 11 years post-  
398 infection. *Vaccine* **34**, 2008-2014 (2016).
- 399 12 Zhao, J. X. *et al.* Recovery from the Middle East respiratory syndrome is associated with antibody and T  
400 cell responses. *Sci. Immunol.* **2**, eaan5393 (2017).
- 401 13 Tang, F. *et al.* Lack of peripheral memory B cell responses in recovered patients with severe acute  
402 respiratory syndrome: a six-year follow-up study. *J. Immunol.* **186**, 7264-7268 (2011).
- 403 14 Dan, J. M. *et al.* Immunological memory to SARS-CoV-2 assessed for up to 8 months after infection.  
404 *Science*, doi:10.1126/science.abf4063 (2021).
- 405 15 Gattinoni, L. *et al.* A human memory T cell subset with stem cell-like properties. *Nat. Med.* **17**, 1290-  
406 1297 (2011).
- 407 16 Gattinoni, L., Speiser, D. E., Lichterfeld, M. & Bonini, C. T memory stem cells in health and disease. *Nat.*  
408 *Med.* **23**, 18-27 (2017).
- 409 17 Fuertes Marraco, S. A. *et al.* Long-lasting stem cell-like memory CD8+ T cells with a naive-like profile  
410 upon yellow fever vaccination. *Sci. Transl. Med.* **7**, 282ra248 (2015).
- 411 18 Akondy, R. S. *et al.* Origin and differentiation of human memory CD8 T cells after vaccination. *Nature*  
412 **552**, 362-367 (2017).



- 413 19 National Institutes of Health. COVID-19 Treatment Guidelines Panel. Coronavirus Disease 2019  
414 (COVID-19) Treatment Guidelines. <https://www.covid19treatmentguidelines.nih.gov> (2020).
- 415 20 Rydzynski Moderbacher, C. *et al.* Antigen-Specific Adaptive Immunity to SARS-CoV-2 in Acute COVID-  
416 19 and Associations with Age and Disease Severity. *Cell* **183**, 996-1012.e19 (2020).
- 417 21 Morou, A. *et al.* Altered differentiation is central to HIV-specific CD4(+) T cell dysfunction in  
418 progressive disease. *Nat. Immunol.* **20**, 1059-1070 (2019).
- 419 22 Shomuradova, A. S. *et al.* SARS-CoV-2 Epitopes Are Recognized by a Public and Diverse Repertoire of  
420 Human T Cell Receptors. *Immunity* **53**, 1245-1257.e5 (2020).
- 421 23 Rha, M. S. *et al.* PD-1-Expressing SARS-CoV-2-Specific CD8(+) T Cells Are Not Exhausted, but Functional  
422 in Patients with COVID-19. *Immunity* **54**, 44-52.e3 (2021).
- 423 24 Galletti, G. *et al.* Two subsets of stem-like CD8(+) memory T cell progenitors with distinct fate  
424 commitments in humans. *Nat. Immunol.* **21**, 1552-1562 (2020).
- 425 25 Schwarzkopf, S. *et al.* Cellular Immunity in COVID-19 Convalescents with PCR-Confirmed Infection but  
426 with Undetectable SARS-CoV-2-Specific IgG. *Emerg. Infect. Dis.* **27**, doi:10.3201/2701.203772 (2020).
- 427 26 Ibarondo, F. J. *et al.* Rapid Decay of Anti-SARS-CoV-2 Antibodies in Persons with Mild Covid-19. *N.*  
428 *Engl. J. Med.* **383**, 1085-1087 (2020).
- 429 27 Isho, B. *et al.* Persistence of serum and saliva antibody responses to SARS-CoV-2 spike antigens in  
430 COVID-19 patients. *Sci. Immunol.* **5**, eabe5511 (2020).
- 431 28 Long, Q. X. *et al.* Clinical and immunological assessment of asymptomatic SARS-CoV-2 infections. *Nat.*  
432 *Med.* **26**, 1200-1204 (2020).
- 433 29 Mateus, J. *et al.* Selective and cross-reactive SARS-CoV-2 T cell epitopes in unexposed humans. *Science*  
434 **370**, 89-94 (2020).
- 435 30 Nelde, A. *et al.* SARS-CoV-2-derived peptides define heterologous and COVID-19-induced T cell  
436 recognition. *Nat. Immunol.* **22**, 74-85 (2020).
- 437 31 Woldemeskel, B. A. *et al.* Healthy donor T cell responses to common cold coronaviruses and SARS-  
438 CoV-2. *J. Clin. Invest.* **130**, 6631-6638 (2020).
- 439 32 Braun, J. *et al.* SARS-CoV-2-reactive T cells in healthy donors and patients with COVID-19. *Nature* **587**,  
440 270-274 (2020).
- 441 33 Almeida, J. R. *et al.* Superior control of HIV-1 replication by CD8+ T cells is reflected by their avidity,  
442 polyfunctionality, and clonal turnover. *J. Exp. Med.* **204**, 2473-2485 (2007).
- 443 34 Betts, M. R. *et al.* HIV nonprogressors preferentially maintain highly functional HIV-specific CD8+ T  
444 cells. *Blood* **107**, 4781-4789 (2006).
- 445 35 Ciuffreda, D. *et al.* Polyfunctional HCV-specific T-cell responses are associated with effective control of  
446 HCV replication. *Eur. J. Immunol.* **38**, 2665-2677 (2008).
- 447 36 Precopio, M. L. *et al.* Immunization with vaccinia virus induces polyfunctional and phenotypically  
448 distinctive CD8(+) T cell responses. *J. Exp. Med.* **204**, 1405-1416 (2007).
- 449 37 Park, S. H. *et al.* Successful vaccination induces multifunctional memory T-cell precursors associated

450 with early control of hepatitis C virus. *Gastroenterology* **143**, 1048-1060.e4 (2012).

451 **Figure Legends**

452 **Fig. 1. SARS-CoV-2-specific IFN- $\gamma$  responses over 8 months post-infection.** PBMC samples  
453 (n=135) from individuals with SARS-CoV-2 infection (n=76) were stimulated with OLPs of S,  
454 M, or N (1  $\mu$ g/mL) for 24 h and the spot-forming units of IFN- $\gamma$ -secreting cells examined by  
455 ELISpot. **a**, Scatter plots showing the relationship between DPSO and IFN- $\gamma$  responses. The  
456 black line is a LOESS smooth nonparametric function, and the grey shading represents the  
457 95% confidence interval. **b**, The composition of S-, M-, or N-specific IFN- $\gamma$  responses among  
458 the total IFN- $\gamma$  responses in each individual. **c**, IFN- $\gamma$  responses were compared between T1  
459 (n=46, 31 - 99 DPSO), T2 (n=37, 100 - 199 DPSO), and T3 (n=23, 200 - 254 DPSO). Data are  
460 presented as median and interquartile range (IQR). **d,e**, IFN- $\gamma$  responses were analyzed in  
461 longitudinally tracked samples (n=82) from 30 individuals. **d**, Scatter plots showing the  
462 relationship between DPSO and IFN- $\gamma$  responses. **e**, IFN- $\gamma$  responses was compared between  
463 paired samples at two time points (n=14; t1, 31 - 100 DPSO; t2, 200 - 254 DPSO). Statistical  
464 analysis was performed using the Kruskal-Wallis test with Dunns' multiple comparisons test  
465 (**c**) or the Wilcoxon signed-rank test (**e**). n.s, not significant.

466  
467 **Fig. 2. Kinetics of SARS-CoV-2-specific activation-induced marker (AIM)<sup>+</sup> T cells.** PBMC  
468 samples (n=125) from individuals with SARS-CoV-2 infection (n=69) were stimulated with  
469 OLPs of S, M, or N (1  $\mu$ g/mL) for 24 h. The frequency of AIM<sup>+</sup> (CD137<sup>+</sup>OX40<sup>+</sup>) cells among  
470 CD4<sup>+</sup> T cells and the frequency of AIM<sup>+</sup> (CD137<sup>+</sup>CD69<sup>+</sup>) cells among CD8<sup>+</sup> T cells were  
471 analyzed. **a,b**, Representative flow cytometry plots showing the frequency of AIM<sup>+</sup> cells  
472 among CD4<sup>+</sup> (**a**) or CD8<sup>+</sup> (**b**) T cells. **c**, Scatter plots showing the relationship between DPSO  
473 and the frequency of AIM<sup>+</sup> cells among CD4<sup>+</sup> (left) or CD8<sup>+</sup> (right) T cells. The black is a LOESS  
474 smooth nonparametric function, and the grey shading represents the 95% confidence  
475 interval.

476  
477 **Fig. 3. Differentiation status of SARS-CoV-2-specific AIM<sup>+</sup> T cells.** **a-d**, PBMC samples  
478 (n=124) from individuals with SARS-CoV-2 infection (n=68) were stimulated with OLPs of S,  
479 M, or N (1  $\mu$ g/mL) for 24 h and the expression of CCR7 and CD45RA was analyzed in AIM<sup>+</sup>  
480 (CD137<sup>+</sup>OX40<sup>+</sup>) CD4<sup>+</sup> (**a,c**) and AIM<sup>+</sup> (CD137<sup>+</sup>CD69<sup>+</sup>) CD8<sup>+</sup> (**b,d**) T cells. **a,b**, Gating strategies  
481 for identifying each memory subset among AIM<sup>+</sup>CD4<sup>+</sup> (**a**) or AIM<sup>+</sup>CD8<sup>+</sup> (**b**) T cells. **c,d**, Scatter

482 plots showing the relationship between DPSO and the proportion of the indicated subsets  
483 among AIM<sup>+</sup>CD4<sup>+</sup> (c) or AIM<sup>+</sup>CD8<sup>+</sup> (d) T cells. e, PBMC samples (n=47) from individuals with  
484 SARS-CoV-2 infection (n=34) were stimulated with OLPs of S, M, or N (1 µg/mL) for 24 h and  
485 the frequency of T<sub>SCM</sub> (CCR7<sup>+</sup>CD45RA<sup>+</sup>CD95<sup>+</sup>) cells was analyzed in AIM<sup>+</sup>CD4<sup>+</sup> (upper) and  
486 AIM<sup>+</sup>CD8<sup>+</sup> (lower) T cells. Left, The gating strategy for identifying T<sub>SCM</sub> cells. Right, Scatter  
487 plots showing the relationship between DPSO and the proportion of T<sub>SCM</sub> cells among  
488 AIM<sup>+</sup>CD4<sup>+</sup> or AIM<sup>+</sup>CD8<sup>+</sup> T cells. The black line is a LOESS smooth nonparametric function, and  
489 the grey shading represents the 95% confidence interval (c,d,e).

490

491 **Fig. 4. Frequency and differentiation status of SARS-CoV-2-specific MHC-I multimer<sup>+</sup> T cells.**

492 PBMC samples (n=15) from individuals with SARS-CoV-2 infection (n=11) were analyzed by  
493 flow cytometry. a, Representative flow cytometry plots showing the *ex vivo* detection of  
494 SARS-CoV-2 S<sub>269</sub> multimer<sup>+</sup>CD8<sup>+</sup> T cells in the gate of CD3<sup>+</sup> T cells. b, Scatter plot showing the  
495 relationship between DPSO and the frequency of SARS-CoV-2 S<sub>269</sub> multimer<sup>+</sup> cells among  
496 total CD8<sup>+</sup> T cells. Samples from the same patient are connected by solid lines. c,d, The  
497 expression of CCR7, CD45RA, and CD95 was analyzed in SARS-CoV-2 S<sub>269</sub> multimer<sup>+</sup> CD8<sup>+</sup> T  
498 cells. IAV MP<sub>58</sub> multimer<sup>+</sup> (n=5) and CMV pp65<sub>495</sub> multimer<sup>+</sup> (n=6) cells from the PBMCs of  
499 healthy donors were also analyzed. Representative flow cytometry plots (c) show the  
500 proportion of the indicated subsets among multimer<sup>+</sup> cells, and scatter plots (d) show the  
501 relationship between DPSO and the proportion of the indicated subsets among SARS-CoV-2  
502 S<sub>269</sub> multimer<sup>+</sup> cells. Samples from the same patient are connected by solid lines. Summary  
503 data showing the proportion of the indicated subsets among IAV multimer<sup>+</sup> and CMV  
504 multimer<sup>+</sup> cells are also presented (d). Horizontal lines represent median. e, A representative  
505 flow cytometry plot (upper) and summary data (lower) showing the percentage of PD-  
506 1<sup>+</sup>TIGIT<sup>+</sup> cells among SARS-CoV-2 S<sub>269</sub> multimer<sup>+</sup> cells and total CD8<sup>+</sup> T cells. Statistical  
507 analysis was performed using the Wilcoxon signed-rank test (e). \*\*P < 0.01.

508

509 **Fig. 5. Polyfunctionality and proliferation capacity of SARS-CoV-2-specific T cells. a-d,**

510 PBMC samples (n=90) from individuals with SARS-CoV-2 infection (n=39) were stimulated  
511 with OLPs of S, M, or N (1 µg/mL) for 6 h. Intracellular cytokine staining was performed to  
512 examine the frequency of polyfunctional cells exhibiting positivity for ≥ 2 effector functions

513 among SARS-CoV-2-specific CD4<sup>+</sup> and CD8<sup>+</sup> T cells. **a**, Representative flow cytometry plots  
514 showing the frequency of polyfunctional cells among CD4<sup>+</sup> (left) and CD8<sup>+</sup> (right) T cells. **b**,  
515 Scatter plots showing the relationship between DPSO and the frequency of polyfunctional  
516 cells among SARS-CoV-2-specific CD4<sup>+</sup> (upper) or CD8<sup>+</sup> (lower) T cells. The black line is a  
517 LOESS smooth nonparametric function, and the grey shading represents the 95% confidence  
518 interval. **c**, The fraction of polyfunctional cells among SARS-CoV-2-specific CD4<sup>+</sup> (left) or CD8<sup>+</sup>  
519 (right) T cells was compared between T1 (n=17, 31 - 99 DPSO), T2 (n=39, 100 - 199 DPSO),  
520 and T3 (n=25, 200 - 254 DPSO). Data are presented as median and IQR. **d**, Pie charts showing  
521 the fraction of cells positive for a given number of functions among SARS-CoV-2-specific  
522 CD4<sup>+</sup> (left) or CD8<sup>+</sup> (right) T cells. Each arc in the pie chart represents the indicated function.  
523 **e**, CTV-labeled PBMCs (n=11) obtained after 200 DPSO were stimulated with S OLP pool (1  
524 µg/mL) for 120 h and the frequency of CTV<sup>low</sup> and Ki-67<sup>+</sup> cells among CD4<sup>+</sup> T cells was  
525 analyzed. Representative plots (upper) and summary data (lower) are presented. Statistical  
526 analysis was performed using the Kruskal-Wallis test with Dunns' multiple comparisons test  
527 (c) or the Wilcoxon signed-rank test (e). n.s, not significant, \*\*\*P < 0.001.

# Figure 1

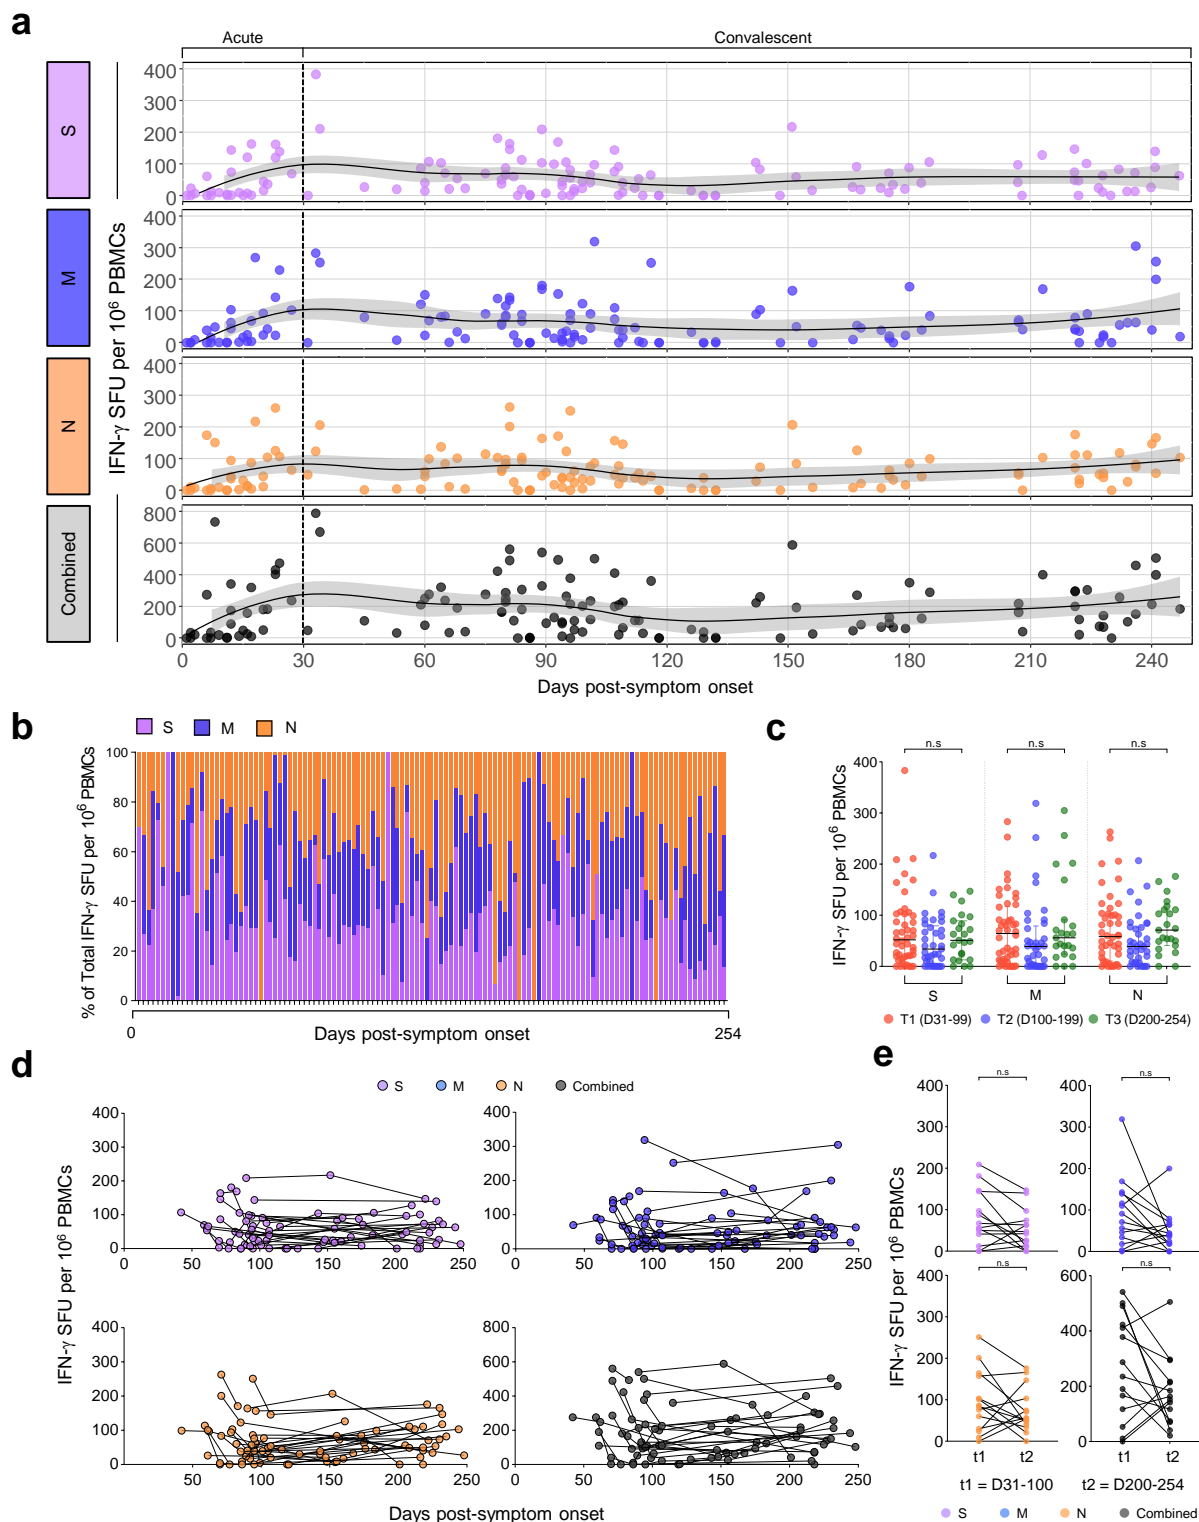

# Figure 2

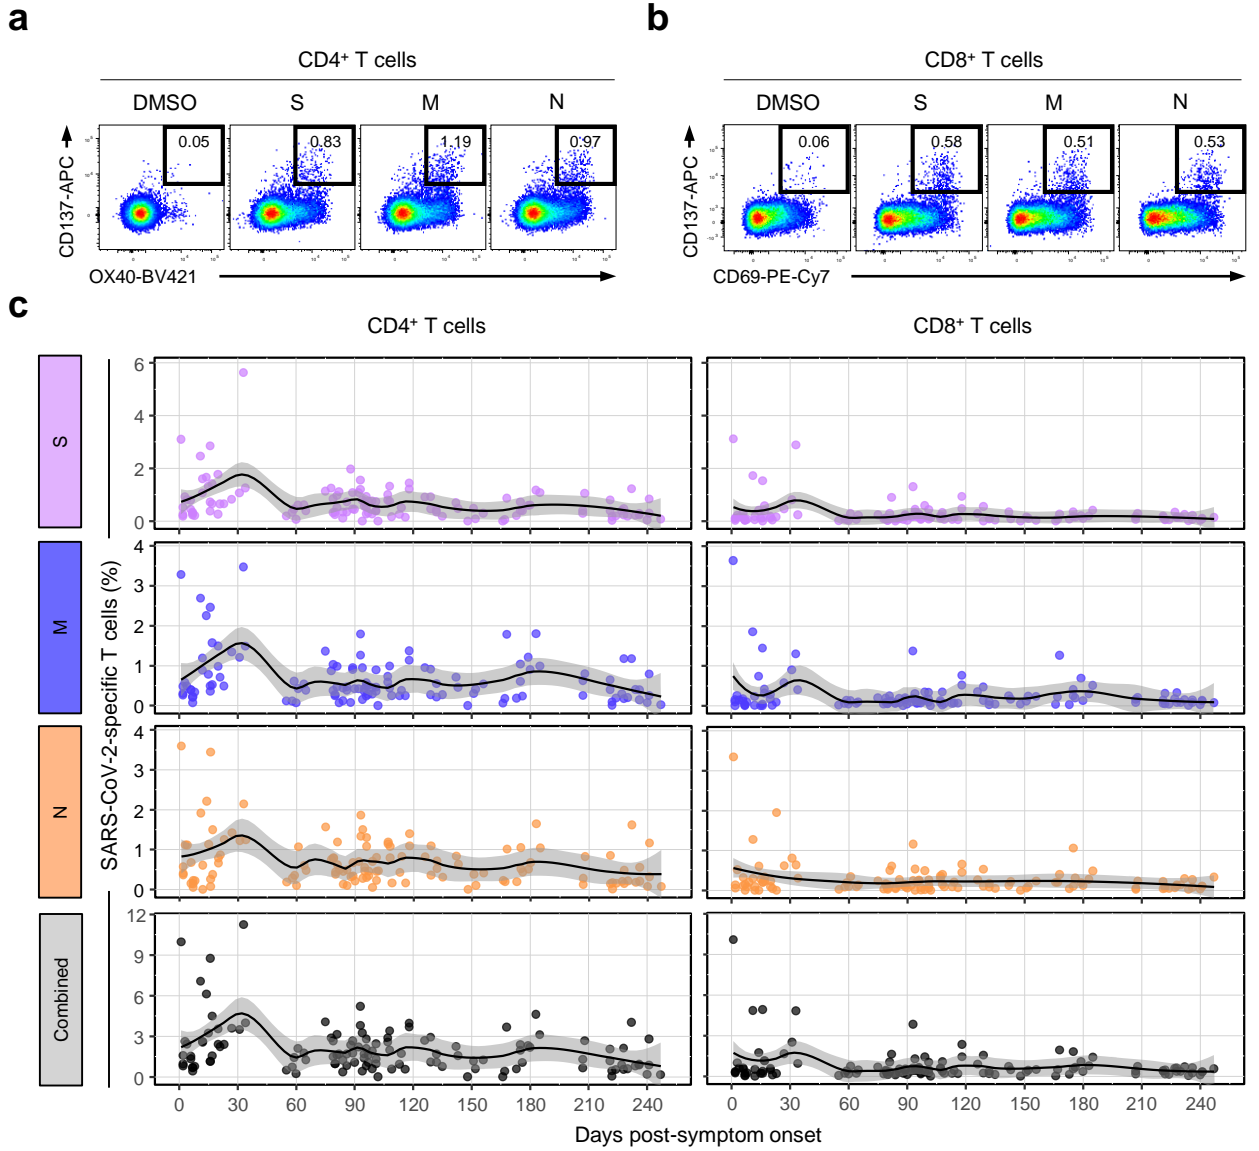

**Figure 3**

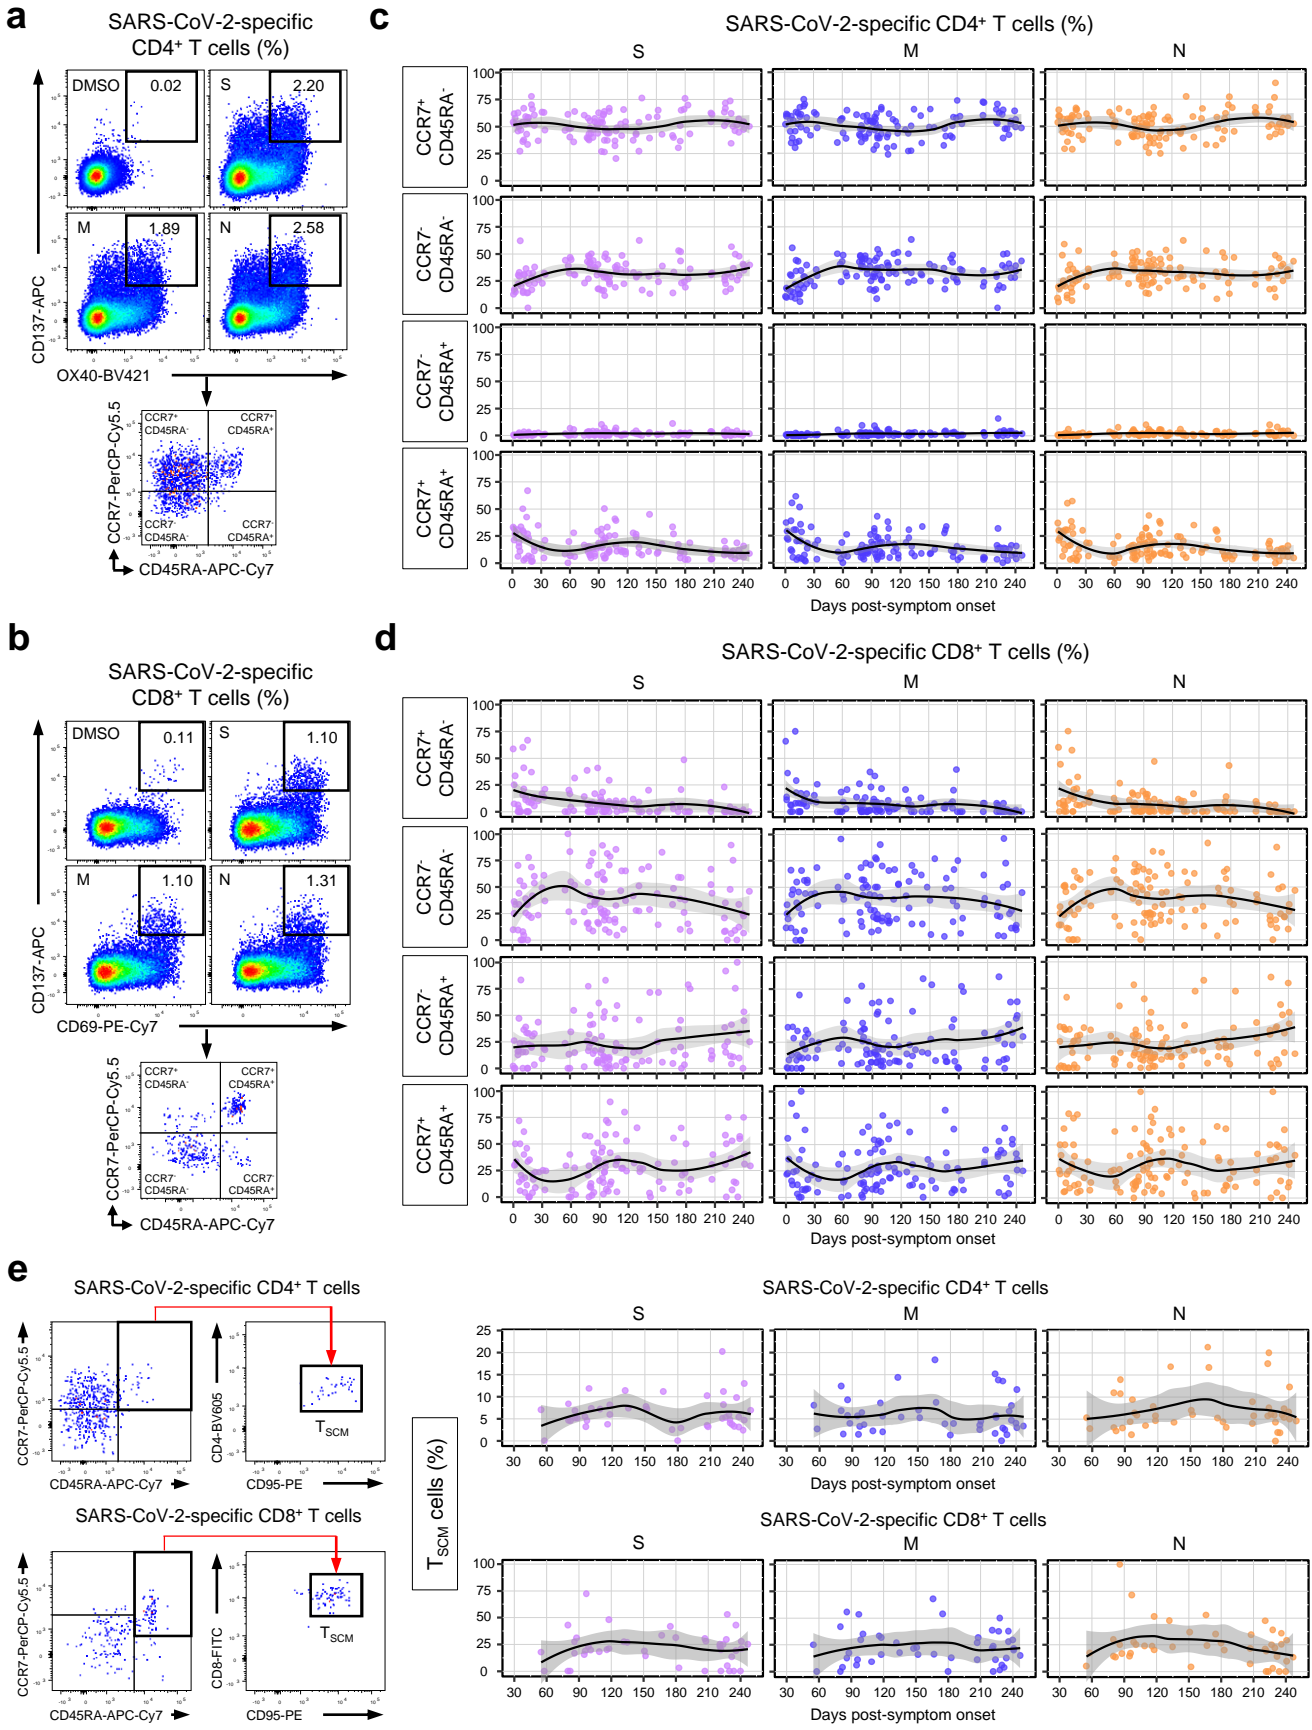



# Figure 4

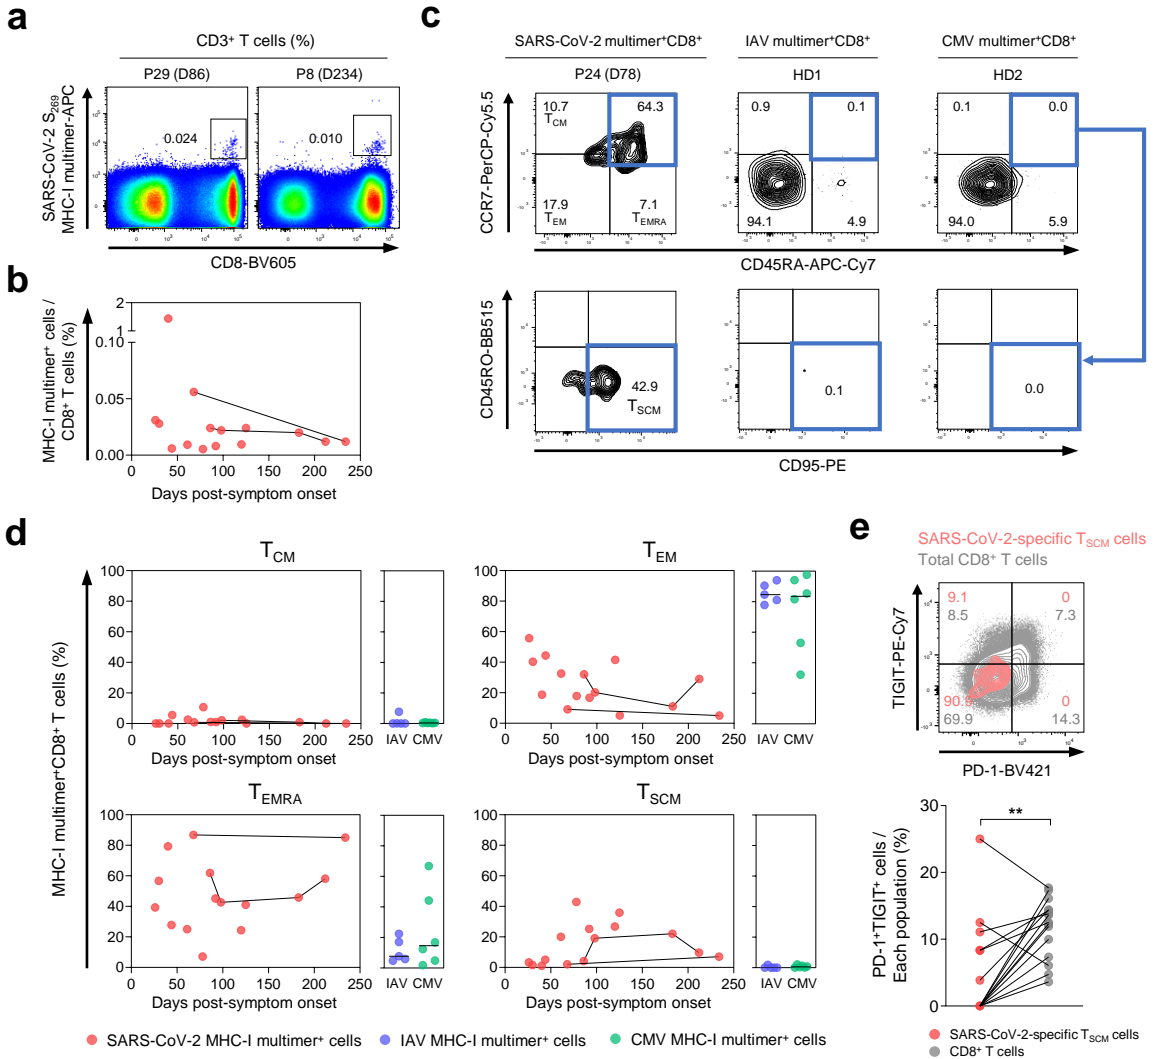

**Figure 5**

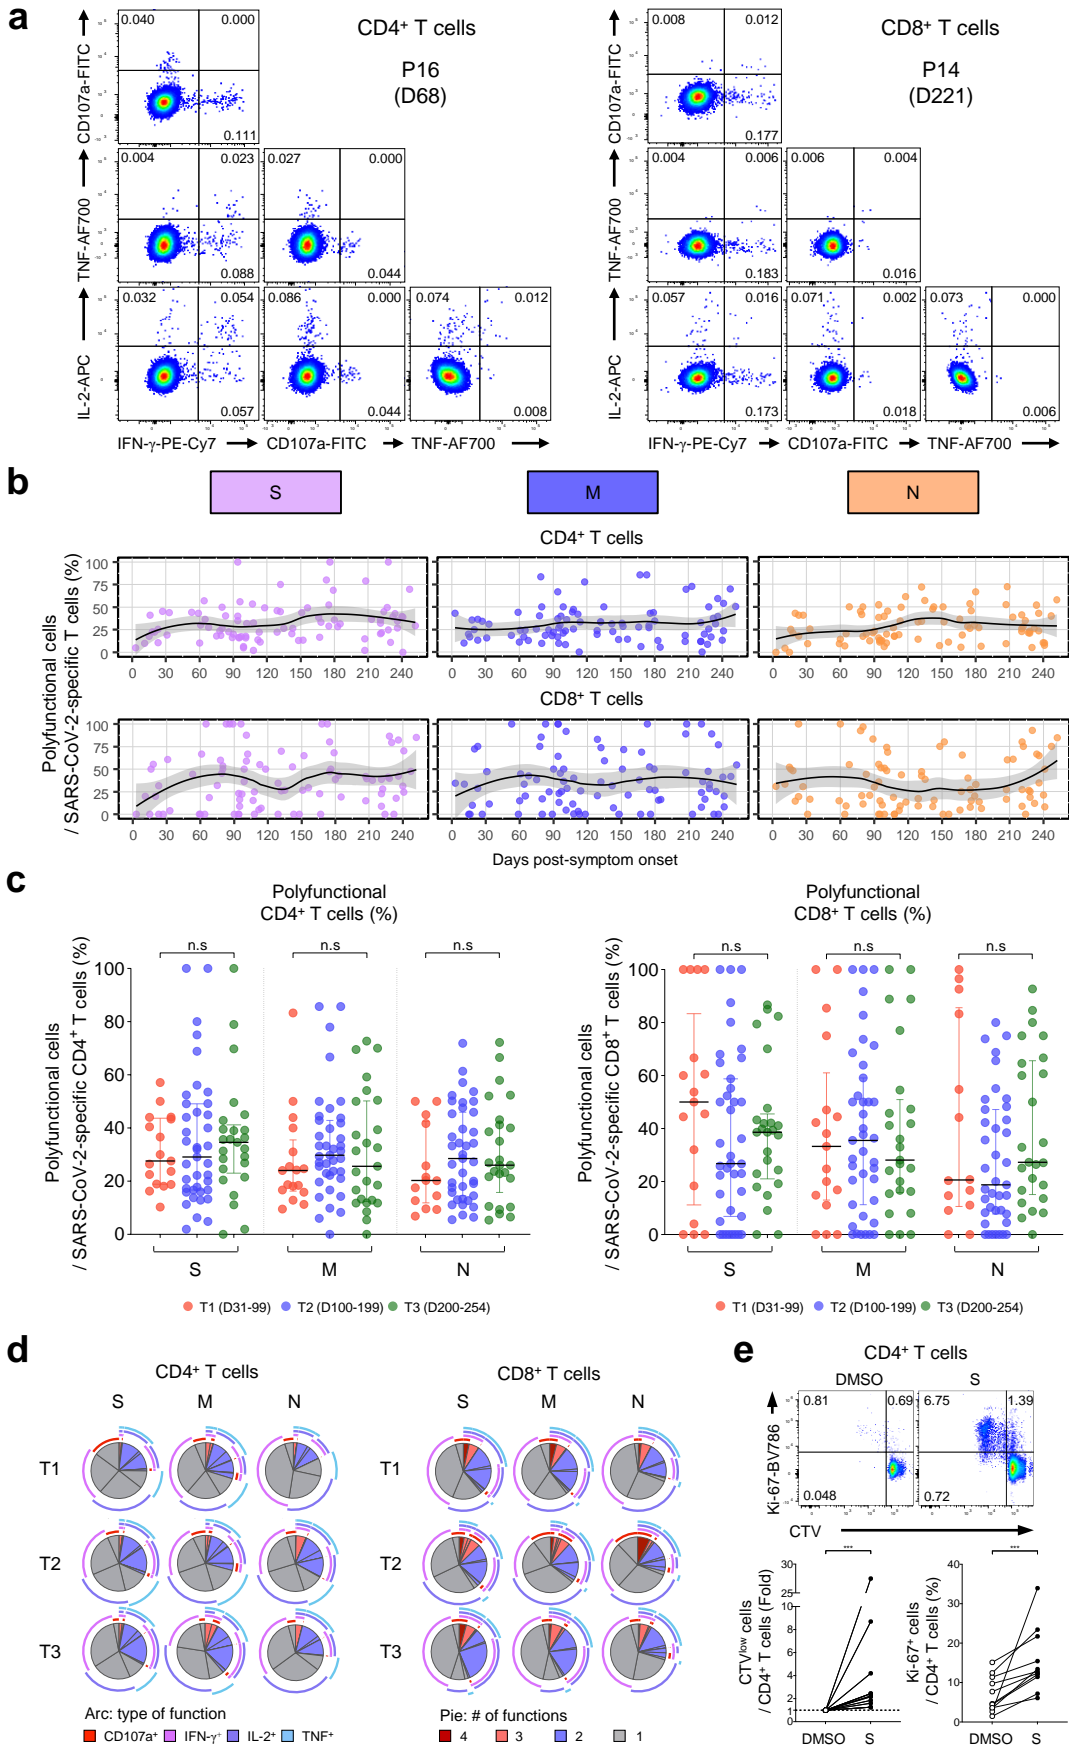

**Supplementary Table 1. Characteristics of enrolled patients**

| Parameter                          | COVID-19 (n=94)           |
|------------------------------------|---------------------------|
| Age(years)                         | 19-96 (median 39, IQR 29) |
| Gender (F/M)                       | 55/39                     |
| Peak disease severity <sup>a</sup> |                           |
| Asymptomatic, n                    | 6 (6.4%)                  |
| Mild, n                            | 44 (46.8%)                |
| Moderate, n                        | 23 (24.5%)                |
| Severe, n                          | 13 (13.8%)                |
| Critical, n                        | 8 (8.5%)                  |
| DPSO at sample collection          | 1-254 (median 94, IQR 93) |
| Blood collection                   |                           |
| Multiple time points, n            | 38                        |
| 2                                  | 16                        |
| 3                                  | 16                        |
| 4                                  | 6                         |
| Single time point, n               | 56                        |
| Assays                             | Total 160 samples         |
| IFN- $\gamma$ ELISpot assays       | 135 samples (n=76)        |
| ICS                                | 90 samples (n=39)         |
| AIM assays                         | 125 samples (n=69)        |
| MHC-I multimer staining            | 15 samples (n=11)         |
| Proliferation assays               | 11 samples (n=11)         |

IQR, interquartile range; DPSO, days post-symptom onset; ELISpot, enzyme-linked immunospot; ICS, intracellular cytokine staining; AIM, activation-induced marker; CTV, CellTrace Violet.

<sup>a</sup>Disease severity was defined by the NIH severity of illness categories.

## Supplementary Table 2. Flow cytometry reagents

| REAGENT                                                          | SOURCE         | IDENTIFIER  |
|------------------------------------------------------------------|----------------|-------------|
| FITC Anti-human CD107a (clone H4A3)                              | BD Biosciences | #555800     |
| APC Anti-human CD137 (clone 4B4-1)                               | BD Biosciences | #550890     |
| BV421 Anti-human CD137 (clone 4B4-1)                             | BD Biosciences | #564091     |
| PE-CF594 Anti-human CD14 (clone M $\phi$ P9)                     | BD Biosciences | #562335     |
| APC Anti-human CD154 (clone TRAP1)                               | BD Biosciences | #555702     |
| PE-CF594 Anti-human CD19 (clone HIB19)                           | BD Biosciences | #562294     |
| BV510 Anti-human CD27 (clone L128)                               | BD Biosciences | #563092     |
| BV510 Anti-human CD3 (clone UCHT1)                               | BD Biosciences | #563109     |
| BV786 Anti-human CD3 (clone UCHT1)                               | BD Biosciences | #565491     |
| BV605 Anti-human CD4 (clone RPA-T4)                              | BD Biosciences | #562658     |
| FITC Anti-human CD4 (clone RPA-T4)                               | BD Biosciences | #555346     |
| PerCP <sup>™</sup> Cy5.5 Anti-human CD4 (clone RPA-T4)           | BD Biosciences | #560650     |
| AF700 Anti-human TNF (clone Mab11)                               | BD Biosciences | #557996     |
| BB515 Anti-human CD45RO (clone UCHL1)                            | BD Biosciences | #564529     |
| PE-Cy7 Anti-human CD69 (clone FN50)                              | BD Biosciences | #557745     |
| APC-Cy7 Anti-human CD8 (clone SK1)                               | BD Biosciences | #560179     |
| BV605 Anti-human CD8 (clone SK1)                                 | BD Biosciences | #564116     |
| BV711 Anti-human CD8 (clone RPA-T8)                              | BD Biosciences | #563677     |
| PE Anti-human CD95 (clone DX2)                                   | BD Biosciences | #555674     |
| PE-Cy7 Anti-human IFN- $\gamma$ (clone 4S.B3)                    | BD Biosciences | #557844     |
| APC Anti-human IL-2 (clone MQ1-17H12)                            | BD Biosciences | #554567     |
| BV786 Anti-human Ki-67 (clone B56)                               | BD Biosciences | #563756     |
| PerCP <sup>™</sup> Cy5.5 Anti-human CCR7 (clone G043H7)          | BioLegend      | #353220     |
| PE Anti-human CD137 (clone 4B4-1)                                | BioLegend      | #309804     |
| APC Anti-human CD3 (clone HIT3a)                                 | BioLegend      | #300312     |
| APC-Cy7 Anti-human CD45RA (clone HI100)                          | BioLegend      | #304128     |
| FITC Anti-human CD8 (clone RPA-T8)                               | BioLegend      | #301050     |
| BV421 Anti-human OX40 (clone Ber-ACT35)                          | BioLegend      | #350014     |
| BV421 Anti-human PD-1 (clone EH12.2H7)                           | BioLegend      | #329920     |
| PE-Cy7 Anti-human TIGIT (clone MBSA43)                           | Invitrogen     | #25-9500-42 |
| APC YLQPRTFLL (SARS-CoV-2 S <sub>269</sub> ) HLA-A*0201 Pentamer | Proimmune      | #4339       |
| APC GILGFVFTL (IAV MP <sub>58</sub> ) HLA-A*0201 Dextramer       | Immudex        | #WB2161     |
| APC NLVPMVATV (CMV pp65 <sub>495</sub> ) HLA-A*0201 Dextramer    | Immudex        | #WB2132     |

# Extended Data Figure 1

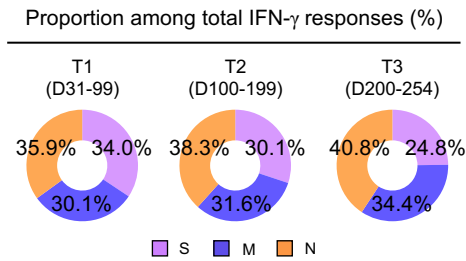

**Extended Data Fig. 1. Proportion of S-, M-, and N-specific IFN- $\gamma$  responses among total IFN- $\gamma$  responses.** PBMC samples from individuals with SARS-CoV-2 infection were stimulated with OLPs of S, M, or N (1  $\mu\text{g}/\text{mL}$ ) for 24 h and spot-forming units of IFN- $\gamma$ -secreting cells were examined by ELISpot. Pie charts showing the proportion of S-, M-, and N-specific IFN- $\gamma$  responses among the total IFN- $\gamma$  responses in T1 (n=46, 31 - 99 DPSO), T2 (n=37, 100 - 199 DPSO), and T3 (n=23, 200 - 254 DPSO).

## Extended Data Figure 2

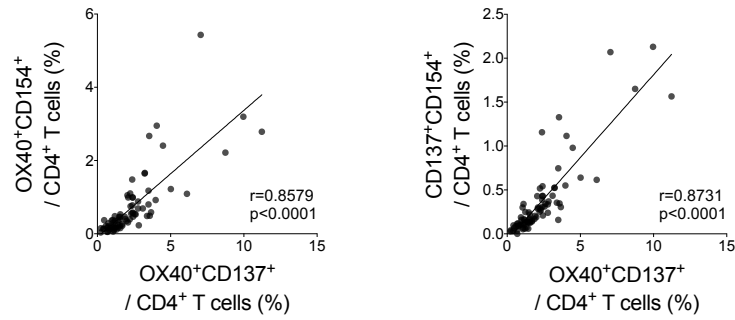

**Extended Data Fig. 2. Correlation between the frequency of CD137<sup>+</sup>OX40<sup>+</sup> cells and the frequencies of alternative AIM<sup>+</sup> cells (OX40<sup>+</sup>CD154<sup>+</sup> or CD137<sup>+</sup>CD154<sup>+</sup> cells) among CD4<sup>+</sup> T cells.** PBMC samples from individuals with SARS-CoV-2 infection were stimulated with OLPs of S, M, or N (1  $\mu\text{g}/\text{mL}$ ) for 24 hours, and the correlation between the frequency of CD137<sup>+</sup>OX40<sup>+</sup> cells and the frequencies of alternative AIM<sup>+</sup> cells (OX40<sup>+</sup>CD154<sup>+</sup> or CD137<sup>+</sup>CD154<sup>+</sup> cells) among CD4<sup>+</sup> T cells was analyzed (n=78). Statistical analysis was performed using the Spearman correlation test.

# Extended Data Figure 3

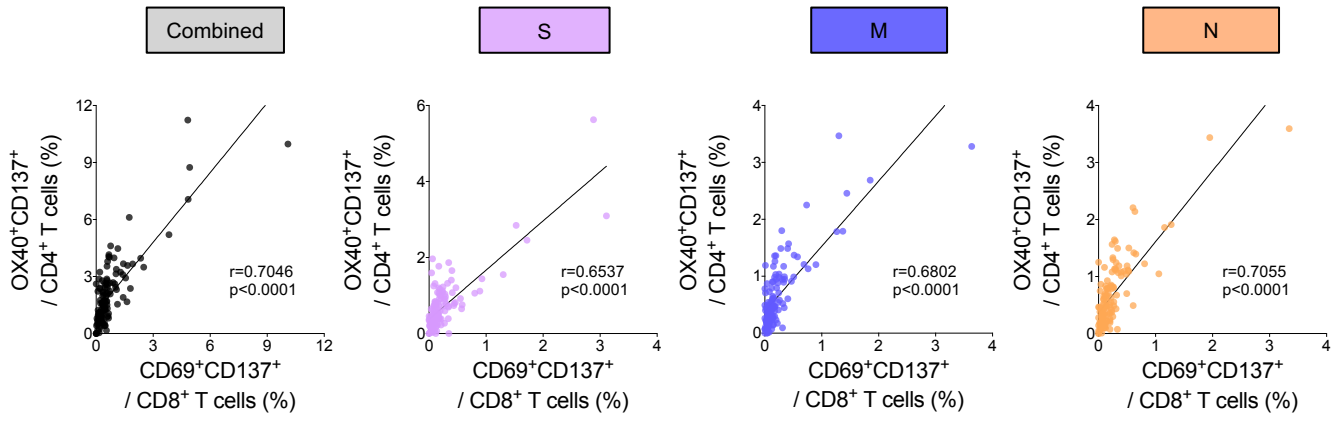

**Extended Data Fig. 3. Correlation of the frequency of AIM+ cells between CD4+ and CD8+ T cells.** PBMC samples from individuals with SARS-CoV-2 infection were stimulated with OLPs of S, M, or N (1  $\mu$ g/mL) for 24 h and the correlation between the frequency of AIM+ (CD137+OX40+) cells among CD4+ T cells and AIM+ (CD137+CD69+) cells among CD8+ T cells was analyzed (n=125). Statistical analysis was performed using the Spearman correlation test.

# Extended Data Figure 4

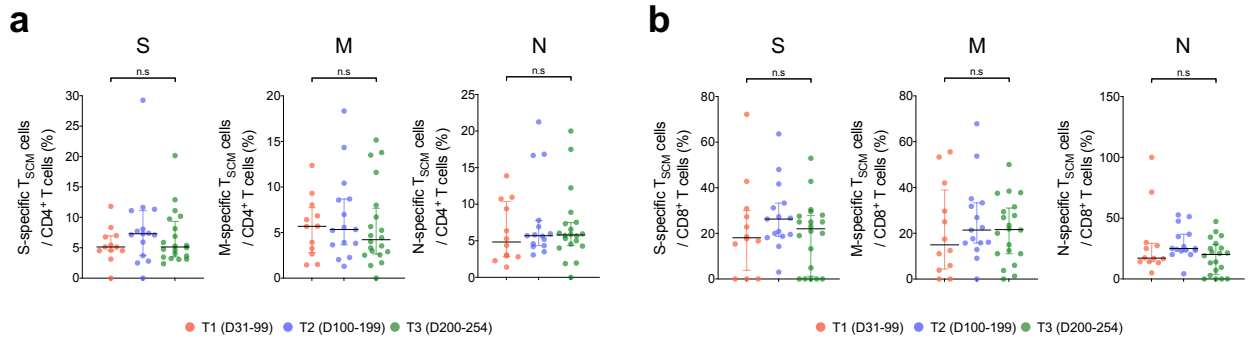

**Extended Data Fig. 4. Frequency of T<sub>SCM</sub> cells among SARS-CoV-2-specific T cells according to days post-symptom onset.** **a,b**, PBMC samples from individuals with SARS-CoV-2 infection were stimulated with OLPs of S, M, or N (1  $\mu$ g/mL) for 24 h and the frequency of T<sub>SCM</sub> (CCR7<sup>+</sup>CD45RA<sup>+</sup>CD95<sup>+</sup>) cells was analyzed among AIM<sup>+</sup> (CD137<sup>+</sup>OX40<sup>+</sup>) CD4<sup>+</sup> (**a**) and AIM<sup>+</sup> (CD137<sup>+</sup>CD69<sup>+</sup>) CD8<sup>+</sup> T cells (**b**). The frequencies of T<sub>SCM</sub> cells were compared between T1 (n=12, 31 - 99 DPSO), T2 (n=14, 100 - 199 DPSO), and T3 (n=20, 200 - 254 DPSO). Data are presented as median and IQR. Statistical analysis was performed using the Kruskal-Wallis test with Dunns' multiple comparisons test. n.s, not significant.
